# Supplementary material for: Molecular Response of Meyerozyma guilliermondii to Patulin: Transcriptomic-Based Analysis
Source: MDPI journal article supplement (doi:10.3390/jof9050538), 2023-04-30
Supplement: s1 [file s1]

## Table captions

**Table. S1:** Primers used in RT-qPCR (*M. guilliermondii*).

| Gene ID    | Gene Name           | Forward primer (5' to 3')                            |
|------------|---------------------|------------------------------------------------------|
|            |                     | Reverse primer (5' to 3')                            |
| PGUG_00994 | <i>NOP53</i>        | TCACAGTCACACTCGTGCCAAAG<br>TGCCACCCACCACCTCATCATC    |
| PGUG_01741 | <i>MRR1</i>         | AACCCATACCGCAACCACAACG<br>ACAAGCCCAAATCTCGCCTCATG    |
| PGUG_01881 | <i>SPCC24B10.20</i> | TGGTCAATCGAAGGCTGCTCT<br>TCGTGGCCCATATCGGTTCC        |
| PGUG_05287 | <i>YML131W</i>      | TCTGCTGCTTCTGGGGCTACC<br>GACGCAAACATCGGCACCAATAC     |
| PGUG_01077 | <i>SPCC663.08c</i>  | CACCGCAGCACACACCATCC<br>GACCAATTCCACGAGAAGCACCAG     |
| PGUG_04552 | <i>GRP2</i>         | AAGGCAGCGTGCGGAGTTTGTTG<br>TCAGCGGTCATGTTGAGCGTTC    |
| PGUG_05192 | <i>YPR022C</i>      | GGTGTTTCGTGGCCTGATTGTGG<br>TGGTTCTGTCTTGTTCTCGTGCTG  |
| PGUG_04009 | <i>YJR096W</i>      | GATCCACTCGCCTCAATCGAACAG<br>TCCAATCCGTCCCATTCCAACAAC |
| PGUG_05193 | <i>SPCC663.09c</i>  | CTGATTGCGGCTCGTTAAACTTGG<br>GCTCCAACGTCTCGCCAACTC    |
| PGUG_01005 | <i>GSH2</i>         | TTCGGAACCTGCTCGTGGTCTTG<br>CGCTCGCCAGGTTGAACAATTAC   |
| PGUG_03271 | <i>MDR1</i>         | GGTCAATGGCAGCAAACTCTTCG<br>CTTCGGCACCAGGAGTGTAGATTG  |
| PGUG_00888 | <i>YHK8</i>         | GACGACGGCAACGACAAGGAG<br>AAGCTAGGGACCATGCTGAGGAG     |
| PGUG-05383 | $\beta$ -tublin     | CCAATTCCTGGCTCCGCTTACG<br>CTGTCCTACTTCCGCACCCTTTTC   |

**Table. S2:** Comparison of clean data and reference genome.

| Treatment | samlpes | reads aligned (%) | exonic (%) | intronic (%) | intergenic (%) |
|-----------|---------|-------------------|------------|--------------|----------------|
| CK        | CK-1    | 96.69             | 85.09      | 0.02         | 14.89          |
|           | CK-2    | 96.58             | 84.87      | 0.02         | 15.11          |
|           | CK-3    | 96.29             | 84.37      | 0.02         | 15.62          |
| Pat       | Pat-1   | 96.46             | 85.70      | 0.02         | 14.28          |
|           | Pat-2   | 96.44             | 85.09      | 0.02         | 14.89          |
|           | Pat-3   | 96.78             | 84.90      | 0.02         | 15.09          |

**Table. S3:** Number of annotated DEGs.

| DEG Set   | DEGs Number | Swiss-Prot | GO  | KEGG | COG | KOG | Pfam | NR  |
|-----------|-------------|------------|-----|------|-----|-----|------|-----|
| CK_vs_Pat | 348         | 281        | 275 | 160  | 105 | 194 | 279  | 323 |
